# Supplementary material for: Bulk-Fill Resins versus Conventional Resins: An Umbrella Review
Source: MDPI journal article supplement (doi:10.3390/polym15122613), 2023-06-08
Supplement: s1 [file s1]

Supplementary table– Citation Matrix

| Number | Columns                   | 1                             | 2                                  | 3                                | 4                                  | 5                       | 6                         | 7                        | 8                       |
|--------|---------------------------|-------------------------------|------------------------------------|----------------------------------|------------------------------------|-------------------------|---------------------------|--------------------------|-------------------------|
| Rows   | Review                    | Arbildo-Vega et al., 2020 [1] | Bellinaso, M. D. et al., 2019 [27] | Cidreira Boaro et al., 2019 [28] | Gerula-Szymańska et al., 2020 [29] | Kruly et al., 2018 [30] | Meereis et al., 2018 [31] | Veloso et al., 2018 [32] | Zotti et al., 2021 [33] |
|        | Number of Primary Studies | 16                            | 3                                  | 148                              | 10                                 | 21                      | 62                        | 10                       | 8                       |
| 1      | Akman et al., 2020        | *                             |                                    |                                  |                                    |                         |                           |                          |                         |
| 2      | Balkaya et al. 2020       | *                             |                                    |                                  |                                    |                         |                           |                          | *                       |
| 3      | Correia et al, 2020       | *                             |                                    |                                  |                                    |                         |                           |                          |                         |
| 4      | Frascino et al, 2020      | *                             |                                    |                                  |                                    |                         |                           |                          |                         |
| 5      | Al-Sheikh, 2019           | *                             |                                    |                                  |                                    |                         |                           |                          |                         |
| 6      | Alquadalhi, 2019          |                               |                                    | *                                |                                    |                         |                           |                          |                         |
| 7      | Balkaya et al, 2019       |                               |                                    | *                                |                                    |                         |                           |                          | *                       |
| 8      | Borges, 2019              |                               |                                    | *                                |                                    |                         |                           |                          |                         |
| 9      | Canali et al, 2019        | *                             |                                    | *                                |                                    |                         |                           |                          |                         |
| 10     | Frascino et al, 2019      |                               |                                    | *                                |                                    |                         |                           |                          |                         |
| 11     | Ewels, 2017               |                               |                                    | *                                |                                    |                         |                           |                          |                         |
| 12     | Hayashi, 2019             |                               |                                    | *                                |                                    |                         |                           |                          |                         |
| 13     | Lacerda, 2019             |                               |                                    | *                                |                                    |                         |                           |                          |                         |
| 14     | Mergulhão, 2019           |                               |                                    | *                                |                                    |                         |                           |                          |                         |
| 15     | Nascimento, 2019          |                               |                                    | *                                |                                    |                         |                           |                          |                         |
| 16     | Par, 2019                 |                               |                                    | *                                |                                    |                         |                           |                          |                         |
| 17     | Rizzante, 2019            |                               |                                    | *                                |                                    |                         |                           |                          |                         |
| 18     | Scribame, 2019            |                               |                                    | *                                |                                    |                         |                           |                          |                         |
| 19     | Taubock, 2019             |                               |                                    | *                                |                                    |                         |                           |                          |                         |
| 20     | Abassi, 2018              |                               |                                    | *                                |                                    |                         |                           |                          |                         |
| 21     | Almeida-Junior, 2017      |                               |                                    | *                                |                                    |                         |                           |                          |                         |
| 22     | Alsagob, 2018             |                               |                                    | *                                |                                    |                         |                           |                          |                         |
| 23     | Arora, 2018               |                               |                                    | *                                |                                    |                         |                           |                          |                         |
| 24     | Behery, 2018              |                               |                                    | *                                |                                    |                         |                           |                          |                         |
| 25     | Cerda-Rtzo, 2018          |                               |                                    | *                                |                                    |                         |                           |                          |                         |
| 26     | Cuevas-Suá, 2018          |                               |                                    | *                                |                                    |                         |                           |                          |                         |
| 27     | Eisharkasi, 2018          |                               |                                    | *                                |                                    |                         |                           |                          |                         |
| 28     | Fronza, 2018              |                               |                                    | *                                |                                    |                         |                           |                          |                         |
| 29     | Gamarra, 2018             |                               |                                    |                                  | *                                  |                         |                           |                          |                         |
| 30     | Gonçalves, 2018           |                               |                                    | *                                |                                    |                         |                           |                          |                         |
| 31     | Haak, 2018                |                               |                                    | *                                |                                    |                         |                           |                          |                         |
| 32     | Heck et al, 2018          | *                             |                                    | *                                |                                    |                         |                           |                          | *                       |
| 33     | Jiekheth, 2018            |                               |                                    | *                                |                                    |                         |                           |                          |                         |
| 34     | Kamalac, 2018             |                               |                                    | *                                |                                    |                         |                           |                          |                         |
| 35     | Kessier, 2018             |                               |                                    | *                                |                                    |                         |                           |                          |                         |
| 36     | Lee, 2018                 |                               |                                    | *                                |                                    |                         |                           |                          |                         |
| 37     | Lempel, 2018              |                               |                                    | *                                |                                    |                         |                           |                          |                         |
| 38     | Meenakumari, 2018         |                               |                                    | *                                |                                    |                         |                           |                          |                         |
| 39     | Nascimento, 2018          |                               |                                    | *                                |                                    |                         |                           |                          |                         |
| 40     | Nowak, 2018               |                               |                                    | *                                |                                    |                         |                           |                          |                         |
| 41     | Ólafsson, 2018            |                               |                                    | *                                |                                    |                         |                           |                          |                         |
| 42     | Oliveira, 2018            |                               |                                    | *                                |                                    |                         |                           |                          |                         |
| 43     | Oter et al, 2018          | *                             |                                    | *                                |                                    |                         |                           |                          |                         |

Supplementary table– Citation Matrix

|    |                             |   |   |   |   |   |   |   |   |
|----|-----------------------------|---|---|---|---|---|---|---|---|
| 44 | Peutzfeldt, 2018            |   |   | * |   |   |   |   |   |
| 45 | Prager, 2018                |   |   | * |   |   |   |   |   |
| 46 | Politi, 2018                |   |   | * |   |   |   |   |   |
| 47 | Shafie, 2018                |   |   | * |   |   |   |   |   |
| 48 | Tekce, 2018                 |   |   | * |   |   |   |   |   |
| 49 | Tsujimoto, 2018             |   |   | * |   |   |   |   |   |
| 50 | Yarmohamadi, 2018           |   |   | * |   |   |   |   |   |
| 51 | Warangkulkasemkit, 2018     |   |   | * |   |   |   |   |   |
| 52 | Yap, 2018                   |   |   | * |   |   |   |   |   |
| 53 | Agarwai, 2017               |   |   | * |   |   |   |   |   |
| 54 | AlShaffi, 2017              |   |   | * |   |   |   |   |   |
| 55 | Algamalah, 2017             |   |   | * |   |   |   |   |   |
| 56 | Almeida-Junior, 2017        |   |   | * |   |   |   |   |   |
| 57 | Atabek et al, 2017          | * |   | * |   |   |   | * |   |
| 58 | Bayraktar et al, 2017       | * |   | * |   |   |   | * |   |
| 59 | Colak et al, 2017           | * |   | * |   |   |   | * | * |
| 60 | Fronza, 2017                |   |   | * |   |   |   |   |   |
| 61 | Han, 2017                   |   |   | * |   |   |   |   |   |
| 62 | Hegde, 2017                 |   |   | * |   |   |   |   |   |
| 63 | Jung, 2017                  |   |   | * |   |   |   |   |   |
| 64 | Karaman et al, 2017         |   |   | * |   |   |   | * |   |
| 65 | Kubo, 2017                  |   |   | * |   |   |   |   |   |
| 66 | McHugh, 2017                |   |   | * |   |   |   |   |   |
| 67 | Miletic, 2017               |   |   | * |   |   |   |   |   |
| 68 | Moharam, 2017               |   |   | * |   |   |   |   |   |
| 69 | Mosharrafian et al, 2017    |   | * | * |   |   |   |   |   |
| 70 | Patnana, 2017               |   |   | * |   |   |   |   |   |
| 71 | Rodrigues, 2017             |   |   | * |   |   |   |   |   |
| 72 | Shibasaki, 2017             |   |   | * |   |   |   |   |   |
| 73 | Shahidi et al, 2017         |   |   |   | * |   |   |   |   |
| 74 | Silame, 2017                |   |   | * |   |   |   |   |   |
| 75 | Souza-Lima, 2017            |   |   | * |   |   |   |   |   |
| 76 | Taha, 2017                  |   |   | * |   |   |   |   |   |
| 78 | Tekce, 2017                 |   |   | * |   |   |   |   |   |
| 79 | Van Dijken et al, 2017      | * |   | * |   |   |   | * |   |
| 80 | Vianna-de-Pinho et al, 2017 |   | * | * |   |   |   |   |   |
| 81 | Yazici et al, 2017          | * |   | * |   |   |   | * | * |
| 82 | Yu, 2017                    |   |   | * |   |   |   |   |   |
| 83 | Al-Harbi et al, 2016        |   |   | * | * |   |   |   |   |
| 84 | Al Sunbul et al, 2016       |   |   | * |   |   | * |   |   |
| 85 | Alkurdi and Abboud, 2016    |   |   |   |   |   |   | * | * |
| 86 | Atalay, 2016                |   |   | * |   |   |   |   |   |
| 87 | Bacchi et al, 2016          |   |   |   |   |   | * |   |   |
| 88 | Bartsch, 2016               |   |   | * |   |   |   |   |   |
| 89 | Bayraktar, 2016             |   |   | * |   | * |   |   |   |
| 90 | Behry, 2016                 |   |   | * |   |   |   |   |   |
| 91 | Bijelic-Donovan, 2016       |   |   | * |   |   |   |   |   |
| 92 | De Assis et al, 2016        |   |   | * | * |   |   |   |   |
| 93 | El Gewazi, 2016             |   |   | * |   |   |   |   |   |
| 94 | Engelhardt, 2016            |   |   | * |   |   |   |   |   |
| 95 | Farahat, 2016               |   |   | * |   |   |   |   |   |
| 96 | Fernandez, 2016             |   |   | * |   |   |   |   |   |
| 97 | Gaspardo, 2016              |   |   |   |   | * |   |   |   |
| 98 | Guo et al, 2016             |   |   | * |   |   | * |   |   |

Supplementary table– Citation Matrix

|     |                            |   |  |   |   |   |   |   |   |
|-----|----------------------------|---|--|---|---|---|---|---|---|
| 99  | Han et al, 2016            |   |  | * |   |   | * |   |   |
| 100 | Isuffi, 2016               |   |  | * |   |   |   |   |   |
| 101 | Jawaed, 2016               |   |  | * |   |   |   |   |   |
| 102 | Karaman, 2016              |   |  | * |   | * |   |   |   |
| 103 | Kapoor, 2016               |   |  | * |   |   |   |   |   |
| 104 | Kelic, 2016                |   |  | * |   |   |   |   |   |
| 105 | Kim et al, 2016            |   |  | * |   |   | * |   |   |
| 106 | Lempel, 2016               |   |  | * |   |   |   |   |   |
| 107 | Nguyen, 2016               |   |  | * |   |   |   |   |   |
| 108 | Ozel, 2016                 |   |  | * |   |   |   |   |   |
| 109 | Öztürk-Bozkurt, 2016       |   |  | * |   |   |   |   |   |
| 110 | Sampaio, 2016              |   |  | * |   |   |   |   |   |
| 111 | Schliebe, 2016             |   |  | * |   |   |   |   |   |
| 112 | Scotti, 2016               |   |  | * |   |   |   |   |   |
| 113 | Son, 2016                  |   |  | * |   |   |   |   |   |
| 114 | Tsujimoto, 2016            |   |  | * |   |   |   |   |   |
| 115 | Van Dijken et al, 2016     | * |  | * |   |   |   | * | * |
| 116 | Vinagre, 2016              |   |  | * |   |   |   |   |   |
| 117 | Yap, 2016                  |   |  | * |   |   |   |   |   |
| 118 | Yasa, 2016                 |   |  | * |   |   |   |   |   |
| 119 | Agarwal et al, 2015        |   |  |   | * |   |   |   |   |
| 120 | Aishall, 2015              |   |  | * |   |   |   |   |   |
| 121 | Al-Harbi et al, 2015       |   |  |   | * |   |   |   |   |
| 122 | Bacchi et al, 2015         |   |  |   |   |   | * |   |   |
| 123 | Beigi Burujeny et al, 2015 |   |  |   |   |   | * |   |   |
| 124 | Benetti et al, 2015        |   |  | * | * |   |   |   |   |
| 125 | Caixeta, 2015              |   |  | * |   |   |   |   |   |
| 126 | Francis, 2015              |   |  | * |   |   |   |   |   |
| 127 | Fronza et al, 2015         |   |  | * |   |   | * |   |   |
| 128 | Gonçalves et al, 2015      |   |  |   |   |   | * |   |   |
| 129 | Heintze et al, 2015        |   |  | * | * |   |   |   |   |
| 130 | Hirata, 2015               |   |  | * |   |   |   |   |   |
| 131 | Ibarra, 2015               |   |  | * |   |   |   |   |   |
| 132 | Jang et al, 2015           |   |  | * |   |   | * |   |   |
| 133 | Kalmowicz, 2015            |   |  | * |   |   |   |   |   |
| 134 | Kemaloglu, 2015            |   |  | * |   |   |   |   |   |
| 135 | Kim et al, 2015            |   |  | * |   |   | * |   |   |
| 136 | Marigo, 2015               |   |  | * |   |   |   |   |   |
| 137 | Marovic, 2015              |   |  | * |   |   |   |   |   |
| 138 | Nagi, 2015                 |   |  | * |   |   |   |   |   |
| 139 | Öznurhan, 2015             |   |  | * |   |   |   |   |   |
| 140 | Par, 2015                  |   |  | * |   |   |   |   |   |
| 141 | Podgorski et al, 2015a     |   |  |   |   |   | * |   |   |
| 142 | Podgorski et al, 2015b     |   |  |   |   |   | * |   |   |
| 143 | Rengo, 2015                |   |  | * |   |   |   |   |   |
| 144 | Rosatto, 2015              |   |  | * |   |   |   |   |   |
| 145 | Schmidt, 2015              |   |  |   |   | * |   |   |   |
| 146 | Taubock, 2015              |   |  | * |   |   |   |   |   |
| 147 | Tomaszewska, 2015          |   |  | * |   |   |   |   |   |
| 148 | Toz 2015                   |   |  | * |   |   |   |   |   |
| 149 | Van Dijken et al, 2015     |   |  |   |   |   |   |   | * |
| 150 | Vidhawan, 2015             |   |  | * |   |   |   |   |   |
| 151 | Zorzin et al, 2015         |   |  | * |   |   | * |   |   |
| 152 | Aleixo et al, 2014         |   |  |   |   |   | * |   |   |

Supplementary table– Citation Matrix

|     |                                |  |   |   |   |   |   |  |  |
|-----|--------------------------------|--|---|---|---|---|---|--|--|
| 153 | Attia, 2014                    |  |   |   |   | * |   |  |  |
| 154 | Bacchi et al, 2014             |  |   |   |   |   | * |  |  |
| 155 | Beck, 2014                     |  |   |   |   | * |   |  |  |
| 156 | Bucuta, 2014                   |  |   | * |   |   |   |  |  |
| 157 | Campos et al, 2014             |  |   | * | * |   |   |  |  |
| 158 | Cantekin, 2014                 |  |   | * |   |   |   |  |  |
| 159 | Do, 2014                       |  |   | * |   |   |   |  |  |
| 160 | El-Dammanhoury and Platt, 2014 |  |   | * |   |   | * |  |  |
| 161 | El-Eraky, 2014                 |  |   |   |   | * |   |  |  |
| 162 | Garcia, 2014                   |  |   | * |   |   |   |  |  |
| 163 | Goracci, 2014                  |  |   | * |   |   |   |  |  |
| 164 | Guler, 2014                    |  |   | * |   |   |   |  |  |
| 165 | Koyuturk, 2014                 |  |   | * |   |   |   |  |  |
| 166 | Leprince, 2014                 |  |   | * |   |   |   |  |  |
| 167 | Mahmoud, 2014                  |  |   |   |   | * |   |  |  |
| 168 | Müller, Karaman, 2014          |  | * |   |   |   |   |  |  |
| 169 | Palin et al, 2014              |  |   |   |   |   | * |  |  |
| 170 | Santos, 2014                   |  |   |   |   | * |   |  |  |
| 171 | Scotti, 2014                   |  |   | * |   |   |   |  |  |
| 172 | Taubock et al, 2014            |  |   | * |   |   | * |  |  |
| 173 | Van Dijken, 2014               |  |   |   |   | * |   |  |  |
| 174 | Walter, 2014                   |  |   |   |   | * |   |  |  |
| 175 | Watts and Alnazzawi, 2014      |  |   |   |   |   | * |  |  |
| 176 | Yazici, 2014                   |  |   |   |   | * |   |  |  |
| 177 | Arslan, 2013                   |  |   | * |   |   |   |  |  |
| 178 | Aishall, 2013                  |  |   | * |   |   |   |  |  |
| 179 | Baracco, 2013                  |  |   |   |   | * |   |  |  |
| 180 | Efes, 2013                     |  |   |   |   | * |   |  |  |
| 181 | Garaoush, 2013                 |  |   | * |   |   |   |  |  |
| 182 | Gonçalves, 2013                |  |   |   |   | * |   |  |  |
| 183 | Szaloki et al, 2013            |  |   |   |   | * |   |  |  |
| 184 | Yamasaki et al, 2013           |  |   |   |   |   | * |  |  |
| 185 | Baracco, 2012                  |  |   |   |   | * |   |  |  |
| 186 | El-Shafty, 2012                |  |   | * |   |   |   |  |  |
| 187 | Gao et al, 2012                |  |   |   |   |   | * |  |  |
| 188 | Gonçalves et al, 2012          |  |   |   |   |   | * |  |  |
| 189 | Leung and Bowman, 2012         |  |   |   |   |   | * |  |  |
| 190 | Li et al, 2012                 |  |   |   |   |   | * |  |  |
| 191 | Liu et al, 2012                |  |   |   |   |   | * |  |  |
| 192 | Moorthy, 2012                  |  |   | * |   |   |   |  |  |
| 193 | Oliveira et al, 2012           |  |   |   |   |   | * |  |  |
| 194 | Park et al, 2012a              |  |   |   |   |   | * |  |  |
| 195 | Park et al, 2012b              |  |   |   |   |   | * |  |  |
| 196 | Park et al, 2012c              |  |   |   |   |   | * |  |  |
| 197 | Satterthwaite et al, 2012      |  |   |   |   |   | * |  |  |
| 198 | Ye et al, 2012                 |  |   |   |   |   | * |  |  |
| 199 | Boulden et al, 2011            |  |   |   |   |   | * |  |  |
| 200 | Schreck et al, 2011            |  |   |   |   |   | * |  |  |
| 201 | Gonçalves et al, 2011          |  |   |   |   |   | * |  |  |
| 202 | Ilie and Hickel, 2011          |  |   |   |   |   | * |  |  |
| 203 | Moraes et al, 2011             |  |   |   |   |   | * |  |  |
| 204 | Roggendorf et al, 2011         |  |   |   | * |   |   |  |  |
| 205 | Schmidt, 2011                  |  |   |   |   | * |   |  |  |
| 206 | Xiong et al, 2011              |  |   |   |   |   | * |  |  |

Supplementary table– Citation Matrix

|     |                            |   |  |  |  |   |   |   |  |
|-----|----------------------------|---|--|--|--|---|---|---|--|
| 207 | Ye et al, 2011             |   |  |  |  |   | * |   |  |
| 208 | Arhun et al, 2010          | * |  |  |  |   |   | * |  |
| 209 | Boaro et al, 2010          |   |  |  |  |   | * |   |  |
| 210 | Cramer et al, 2010a        |   |  |  |  |   | * |   |  |
| 211 | Cramer et al, 2010b        |   |  |  |  |   | * |   |  |
| 212 | Gonçalves et al, 2010a     |   |  |  |  |   | * |   |  |
| 213 | Gonçalves et al, 2010b     |   |  |  |  |   | * |   |  |
| 214 | Manhart et al, 2010        | * |  |  |  |   |   | * |  |
| 215 | Marchesi et al, 2010       |   |  |  |  |   | * |   |  |
| 216 | Min et al, 2010            |   |  |  |  |   | * |   |  |
| 217 | Bottenberg, 2009           |   |  |  |  | * |   |   |  |
| 218 | Pfeifer et al, 2009        |   |  |  |  |   | * |   |  |
| 219 | Van Dijken, 2009           |   |  |  |  | * |   |   |  |
| 220 | Cadenaro et al, 2008       |   |  |  |  |   | * |   |  |
| 221 | Chappelow et al, 2008      |   |  |  |  |   | * |   |  |
| 222 | Garoushi et al, 2008       |   |  |  |  |   | * |   |  |
| 223 | Bottenberg, 2007           |   |  |  |  | * |   |   |  |
| 224 | Carioscia et al, 2007      |   |  |  |  |   | * |   |  |
| 225 | Charton et al, 2007        |   |  |  |  |   | * |   |  |
| 226 | Eick et al, 2007           |   |  |  |  |   | * |   |  |
| 227 | Efes, 2006                 |   |  |  |  | * |   |   |  |
| 228 | Carioscia et al, 2005      |   |  |  |  |   | * |   |  |
| 229 | Lu et al, 2005             |   |  |  |  |   | * |   |  |
| 230 | Wilder et al, 2005         |   |  |  |  |   | * |   |  |
| 231 | Ernst et al, 2004          |   |  |  |  |   | * |   |  |
| 232 | Lu et al, 2004             |   |  |  |  |   | * |   |  |
| 233 | Ferracane et al, 2003      |   |  |  |  |   | * |   |  |
| 234 | Braga and Ferracane, 2002  |   |  |  |  |   | * |   |  |
| 235 | Condon and Ferracane, 2002 |   |  |  |  |   | * |   |  |
| 236 | Condon and Ferracane, 1998 |   |  |  |  |   | * |   |  |
